# Supplementary material for: Isolation, Screening, and Characterization of Antibiotic-Degrading Bacteria for Penicillin V Potassium (PVK) from Soil on a Pig Farm
Source: MDPI journal article supplement (doi:10.3390/ijerph16122166), 2019-06-19
Supplement: s1 [file s1]

Supplementary Material (IJEROH 504055)

TGGCTCAGGATGAACGCTGGCGGCGTCCATAATACATGCAAGTCGAGCGAATGGATTAAGAGCTTGCTCTTATGAAGTTAGCG  
GCGGACGGGTGAGTAACACGTGGTAACCTGCCATAAGACTGGGATACTCCGGGAAACCGGGGCTAATACCGGATAACATT  
TTGAATGCATGGTTCGAAATTGAAAGGCGGCTTCGGCTGTCACTTATGGATGGACCCGCGTCATTAGCTAGTTGGTGAGGT  
AACGGCTCACCAAGGCAACGATGCGTAGCCGACCTGAGAGGGTGATCGGCCACTGGGACTGAGACACGGCCAGACTCCT  
ACGGGAGGCGAGTAGGGAAATCTCCGCAATGGACGAAAGTCTGACGGAGCAACCGCGTGAGTGATGAAGGCTTTCGG  
GTCGTAAACTCTGTTTAGGGAAGAACAAGTGCTAGTTGAATAAGCTGGCACCTTGACGGTACCTAACAGAAAGCCACGG  
CTAACTACGTGCCAGCGCGTAATACGTAGGTGGCAAGCGTTATCCGGAATTATTGGGCGTAAAGCGCGCAGGTGGT  
TTCTTAAGTCTGATGTAAAGCCCACGGCTCAACCGTGGAGGGTATTGGAACTGGGAGACTTGAAGTGCAGAAGAGGAAA  
TGGAATCCATGTGTAGCGGTGAAATGCGTAGAGATATGGAGGAACACCAGTGGCGAAGGCGACTTCTGGTCTGTAACGAC  
ACTGAGGCGCGAAAGCGTGGGAGCAAACAGGATTAGATACCTGTAGTCCACGCGTAAACGATGAGTGAAGTGTAG  
AGGGTTTCCGCCCTTCTAGTCTGAAGTTAACGCATTAAGCACTCCGCTGGGGAGTACGCCGCAAGGCTGAACTCAAAGG  
AATTGACGGGGCCCGCACAAAGCGGTGGAGCATGTGGTTAATTCGAAGCAACGCGAAGAACCTTACCAGGTCTTGACATCCT  
CTGAAAACCTAGAGATAGGGCTTCTCCTTCGGGAGCAGAGTACAGGTTGTCATGTTGTCGTCAGCTCGTGTGAGAT  
GTTGGTTAAGTCCCACGAGCGCAACCTTGATCTTAGTTGCCATTAAGTTGGGCACTTAAGGTGACTGCCGGTGAC  
AAACCGGAGGAAGTGGGGATGACGTCAAATCATCATGCCCTTATGACCTGGGCTACACAGTGTACAATGGACGGTACAA  
AGAGCTGCAAGACCGGAGGTGGAGCTAATCTCATAAAACCGTTCTCAGTTCGATTGTAGGCTGCAACTCGCTACATGAAG  
CTGGAATCGTAGTAATCGCGATCAGCATGCCGCGTGAATACGTTCCCGGCTGTACACACCGCCGTCACACCACGAGA  
GTTTGTAAACCCGAAGTCGGTGGGTAACCTTTTGGAGCCAGCCGCTAAGGTGGGACAGATGATTGGGTTGAAGTCGTA  
ACAA

**Figure 1S.** 16S rDNA sequencing of bacterial isolate LM-1.

TGGCTCAGGACGAACGCTGGCGCGTGCCTAATACATGCAAGTCGAGCGGACAGAAGGGAGCTTGCTCCCGGA  
TGTTAGCGGCGGACGGGTGAGTAACACGTTGGTAACCTGCCTGTAAGACTGGGATAACTCCGGGAAAACGGAG  
CTAATACCGGATAGTTCCTTGAACCGCATGGTTCAAGGATGAAAGACGGTTTCGGCTGTCACCTACAGATGGAC  
CCGCGGCGCATTAGCTAGTTGGTGAGGTAACGGCTACCAAGGCGACGATGCGTAGCCGACCTGAGAGGGTGA  
TCGGCCACACTGGGACTGAGACACGGCCCAGACTCCTACGGGAGGCAGCAGTAGGGAATCTTCCGCAATGGA  
CGAAAGTCTGACGGAGCAACGCCGCTGAGTGATGAAGTTTTTCGGATCGTAAAGCTCTGTTGTTAGGGAAGA  
ACAAGTGCAAGAGTAACTGCTTGACCTTGACGGTACCTAACCCAGAAAGCCACGGCTAACTACGTGCCAGCAG  
CCGCGGTAATACGTAGGTGGCAAGCGTTGTCCGGAATTATTGGGCGTAAAGGGCTCGCAGGCGGTTTCTTAAAGT  
CTGATGTGAAAGCCCCGGCTCAACCGGGAGGGTCATTGGAACTGGGAACTTGAGTGCAAGAGGAGA  
GTGGAATCCACGTGTAGCGGTGAAATGCGTAGAGATGTGGAGGAACACCAGTGGCGAAGGCGACTCTCTGGT  
CTGTAACGTACGCTGAGGAGCGAAAGCGTGGGAGCGAACAGGATTAGATACCCTGGTAGTCCACCGCGTAAA  
CGATGAGTGCTAAGTGTAGGGGTTTCCGCCCTTAGTGTGACGCTAACGCATTAAGCACTCCGCTGGGGA  
GTACGGTCGCAAGACTGAAACTCAAAGGAATTGACGGGGCCCGCACAAGCGGTGGAGCATGTGGTTAATTC  
GAAGCAACGCGAAGAACCTTACCAGGTCTTGACATCTCTGACAACCCTAGAGATAGGGCTTTCCTTCGGGG  
ACAGAGTGACAGGTGGTGCATGGTTGTCGTCAGCTCGTGTGAGATGTTGGGTTAAGTCCCGCAACGAGCG  
CAACCTTGATCTTAGTTGCCAGATTGAGTTGGGCACTCTAAGGTGACTGCCGGTGACAAACCGGAGGAAGG  
TGGGGATGACGTCAAATCATCATGCCCTTATGACCTGGGCTACACACGTGCTACAATGGACAGAACAAGGGC  
TGCAGACCGCAAGGTTTAGCCAATCCACAAAATCTGTTCTCAGTTCGGATCGCAGTCTGCAACTCGACTGCGT  
GAAGCTGGAATCGCTAGTAATCGCGGATCAGCATGCCGCGTGAATACGTTCCCGGGCCTTGACACACCGCCC  
GTCACACCAGAGAGTTTGCAACACCCGAAGTCGGTGAGGTAACCTTTATGGAGCCAGCCCGCAAGGTGGG  
GCAGATGATTGGGGTGAAGTCGTAACAA

**Figure 2S.** 16S rDNA sequencing of bacterial isolate LM-2.
